# Supplementary material for: Is resource partitioning between two sympatric species of Gracilinanus (Didelphimorphia: Didelphidae) related to trophic and spatial niches?
Source: publisher site journal article supplement (doi:10.1515/mammalia-2021-0157), 2022-07-13
Supplement: Supplementary file 1 [file j_mammalia-2021-0157_suppl_001.docx]

**Supplementary Material**

**Is resource partitioning between two sympatric species of *Gracilinanus* (Didelphimorphia: Didelphidae) related to trophic and spatial niches?**

Cristiano Schetini de Azevedo et al.

DOI 10.1515/mammalia-2021-0157

**Supplementary Figure S1:** Results of Pearson’s correlation among the independent variables analysed. Values greater than 0.6 were excluded from the GLM models.
